# Supplementary material for: Prevalence of Toxocara and Toxascaris infection among human and animals in Iran with meta-analysis approach
Source: PubMed Central journal article supplement (PMC6947998; doi:10.1186/s12879-020-4759-8), 2020-01-07
Supplement: 12879_2020_4759_MOESM4_ESM.pdf [file 12879_2020_4759_MOESM4_ESM.pdf]

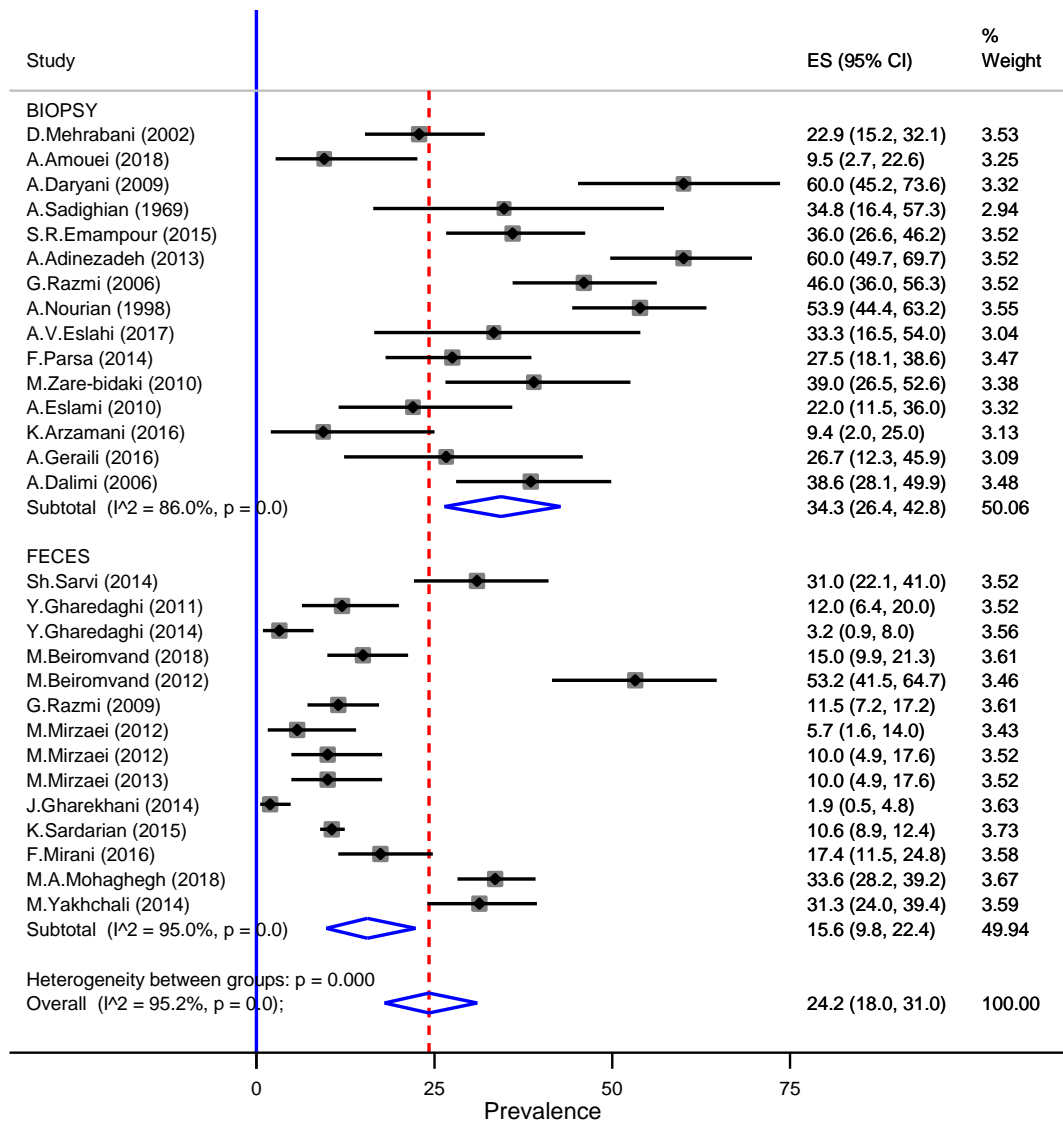

**Supplementary Fig. 4** The weighted prevalence of *Toxocara/Toxascaris* in Iran dogs by study method
